# Supplementary material
Source: PubMed Central journal article supplement (PMC6289096)
Supplement: mmc1.pdf [file mmc1.pdf]

**Biophysical Journal, Volume 115**

**Supplemental Information**

**Spatially Resolving the Condensing Effect of Cholesterol in Lipid  
Bilayers**

**Felix Leeb and Lutz Maibaum**

Supporting Material  
**Spatially Resolving the Condensing Effect  
of Cholesterol in Lipid Bilayers**  
Felix Leeb and Lutz Maibaum

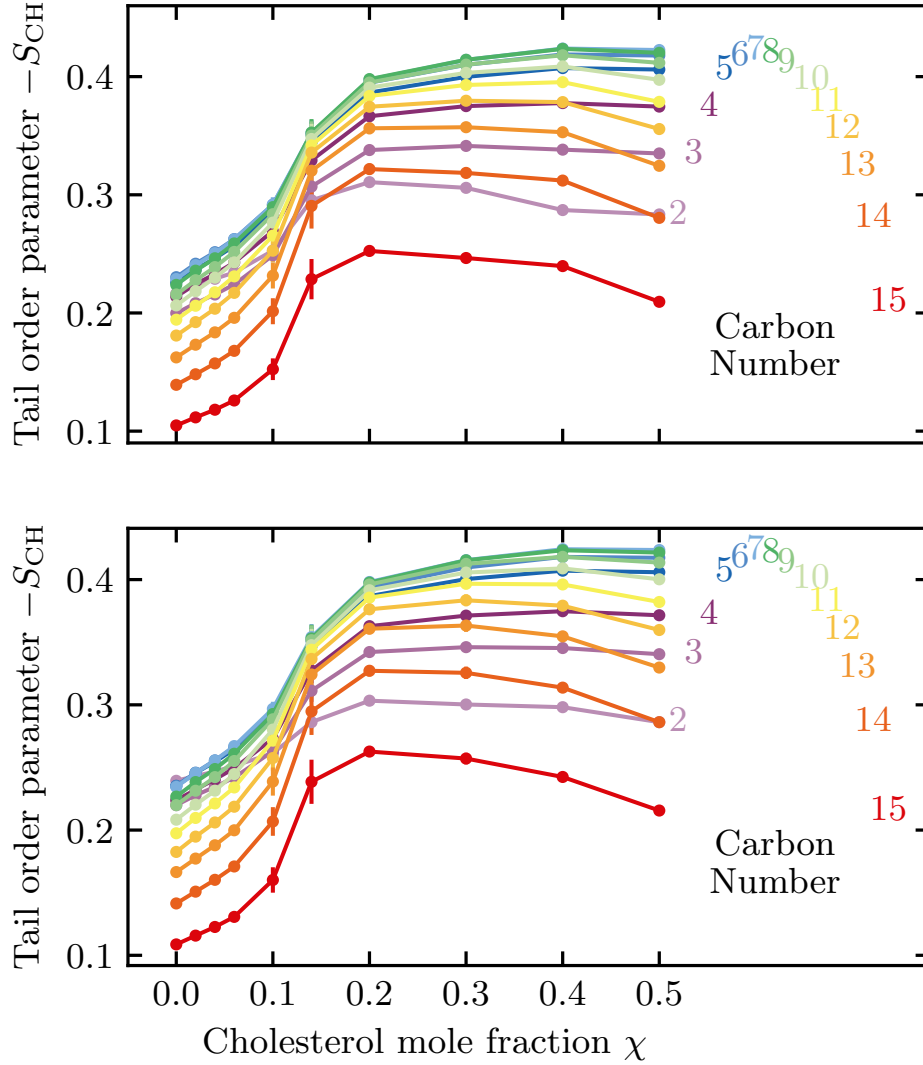

FIG. S1. Tail order parameters as a function of cholesterol mole fraction. The data is the same as that shown in Figure 3 of the main text. Each line corresponds to a carbon atom in the sn-1 (top) or sn-2 (bottom) chain of DPPC.
